# Supplementary material for: NDRG2 as a marker protein for brain astrocytes
Source: PubMed Central journal article supplement (PMC4077251; doi:10.1007/s00441-014-1837-5), 2014-05-10
Supplement: 441_2014_1837_MOESM1_ESM.pdf [file 441_2014_1837_MOESM1_ESM.pdf]

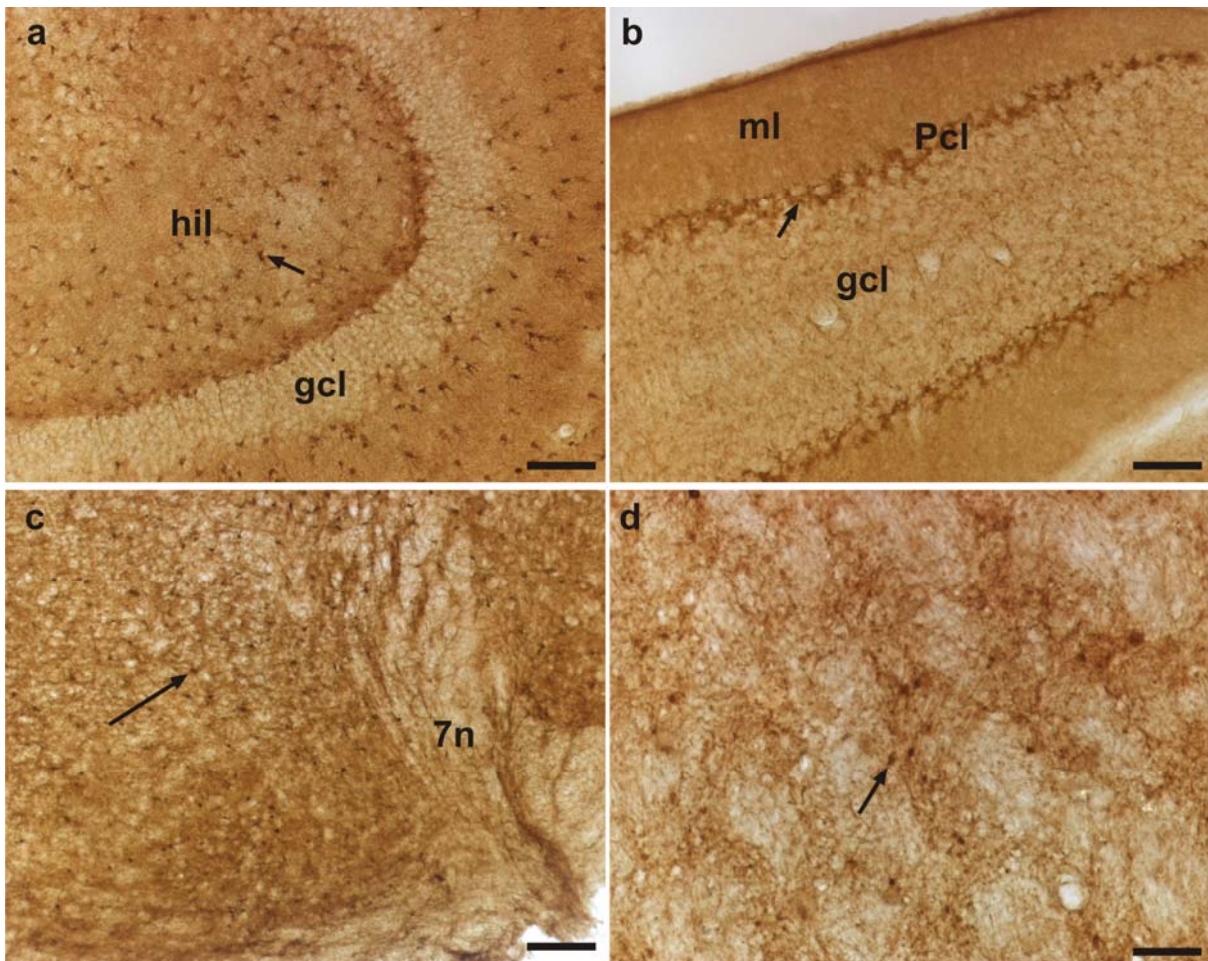

**Figure S1**

NDRG2 in brain sections from different species. Sections were incubated with goat anti NDRG2 antibody and immunohistochemically processed for light microscopy as described in Materials and methods. In **a**: Marmoset dentate gyrus. In **b**: Tree shrew cerebellum: Note the strongly stained astrocytes in the Purkinje cell layer (Pcl). In **c**: Mouse brain stem with facial nerve (7n). In **d**: Human formatio reticularis. Abbreviations: gcl, granule cell layer; hil, hilus; ml, molecular layer. Arrows denote NDRG2 immunopositive astrocytes. Calibration bars represent 100  $\mu\text{m}$  in **a-c**, 25  $\mu\text{m}$  in **d**
