# Supplementary material for: NDRG2 as a marker protein for brain astrocytes
Source: PubMed Central journal article supplement (PMC4077251; doi:10.1007/s00441-014-1837-5), 2014-05-10
Supplement: 441_2014_1837_MOESM2_ESM.pdf [file 441_2014_1837_MOESM2_ESM.pdf]

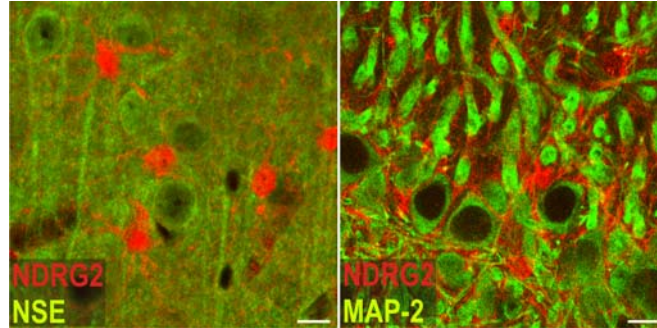

**Figure S2**

NDRG2 does not co-localize with the neuronal markers NSE (neuron specific enolase) and MAP2 (microtubule-associated protein 2). Left, rat neocortex; right, rat CA3. Double immunofluorescence experiments were performed with antibodies goat anti NDRG2, rabbit anti NSE and/or rabbit anti MAP2 as described in Materials and methods. Calibration bars: 10  $\mu\text{m}$
